# Supplementary material for: Ponatinib (AP24534) inhibits MEKK3-KLF signaling and prevents formation and progression of cerebral cavernous malformations
Source: PubMed Central journal article supplement — Sci Adv. 2018 Nov 7;4(11):eaau0731. doi: 10.1126/sciadv.aau0731 (PMC6221540; doi:10.1126/sciadv.aau0731), 2018-11-07
Supplement: aau0731_SM.pdf [file aau0731_SM.pdf]

## Supplementary Materials for

### **Ponatinib (AP24534) inhibits MEKK3-KLF signaling and prevents formation and progression of cerebral cavernous malformations**

Jaesung P. Choi, Rui Wang, Xi Yang, Xian Wang, Lu Wang, Ka Ka Ting, Matthew Foley, Victoria Cogger, Zhuo Yang, Feng Liu, Zhiming Han, Renjing Liu, Jonathan Baell, Xiangjian Zheng\*

\*Corresponding author. Email: x.zheng@sydney.edu.au

Published 7 November 2018, *Sci. Adv.* 4, eaau0731 (2018)  
DOI: 10.1126/sciadv.aau0731

#### **This PDF file includes:**

Fig. S1. Three-dimensional structural comparison of the binding between ponatinib and Abl, FGFR4, and MEKK3.

Fig. S2. Two-dimensional mapping of ponatinib interaction with Abl, FGFR4, and MEKK3.

Fig. S3. CCM1, p38, and MEKK3 expression in cultured HUVECs.

Fig. S4. MEKK3 is the dominant regulator of KLF signaling.

Fig. S5. Confocal images of Tg(*cmlc2*:EGFP) embryos injected with control, *ccm2*, or *ccm2* + *mekk2* morpholinos.

Fig. S6. Effects of ponatinib and other kinase inhibitors on KLF2 expression.

Fig. S7. qPCR quantification of CCM gene expression in brain endothelial cells isolated from 4-HT-induced p6 pups.

Fig. S8. Hematoxylin and eosin staining of CCM lesions at P13.

Fig. S9. Hematoxylin and eosin staining of CCM lesions at P30.

Supplementary Materials

Supplementary Figure S1

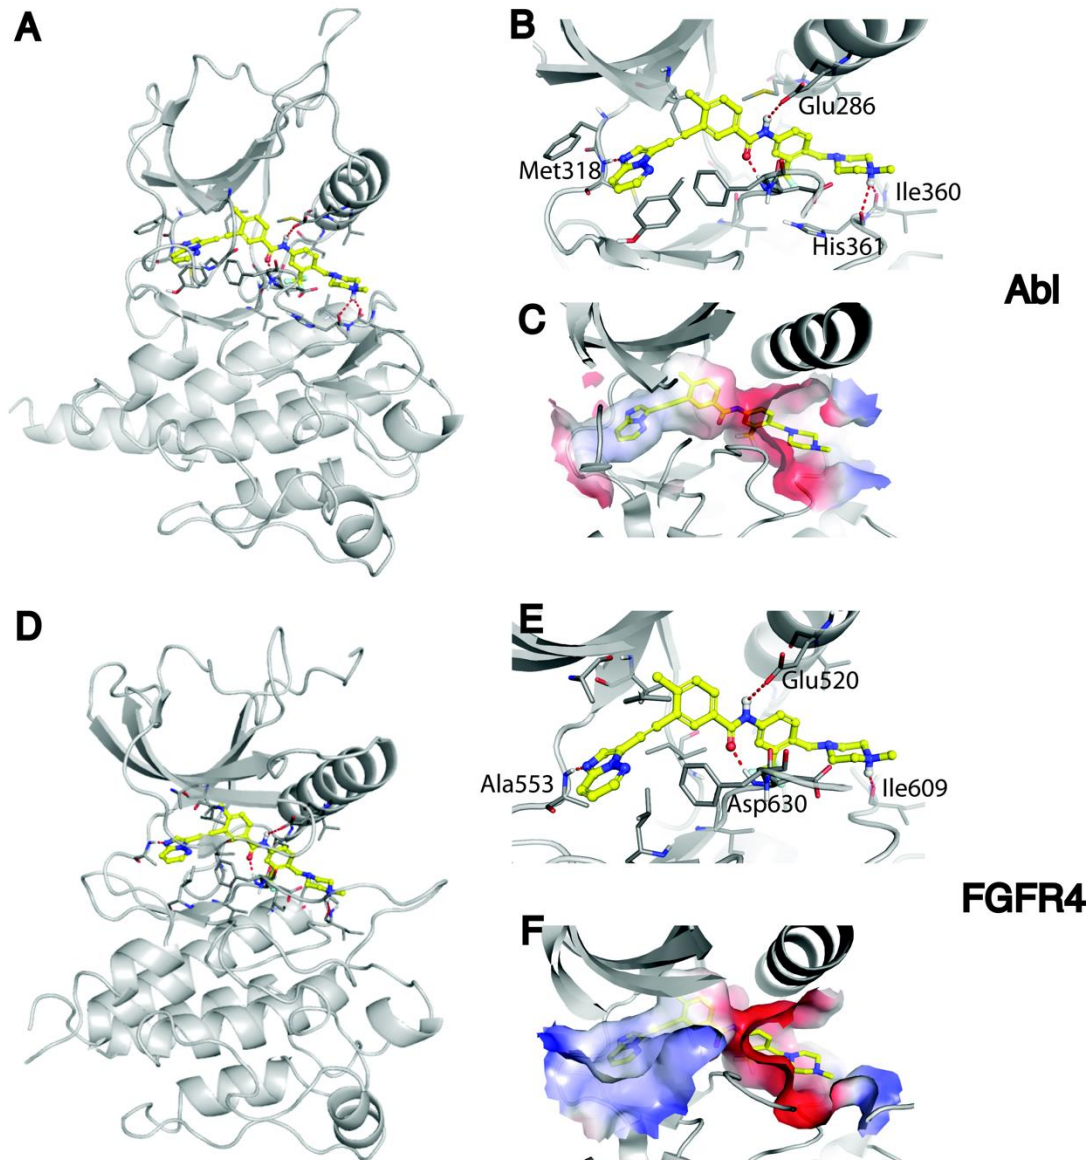

**Fig. S1. Three-dimensional structural comparison of the binding between ponatinib and Abl, FGFR4, and MEKK3. (A-C) Ribbon and surface plot of Ponatinib binding to Abl. (D-F) Ribbon and surface plot of Ponatinib binding to FGFR4.**

## Supplementary Figure S2

### A

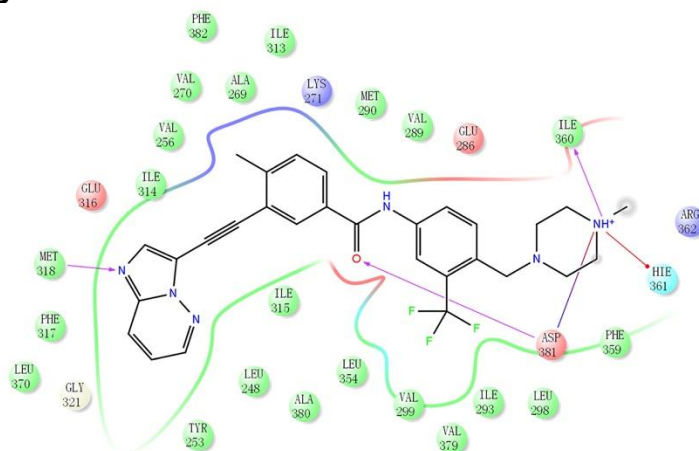

### B

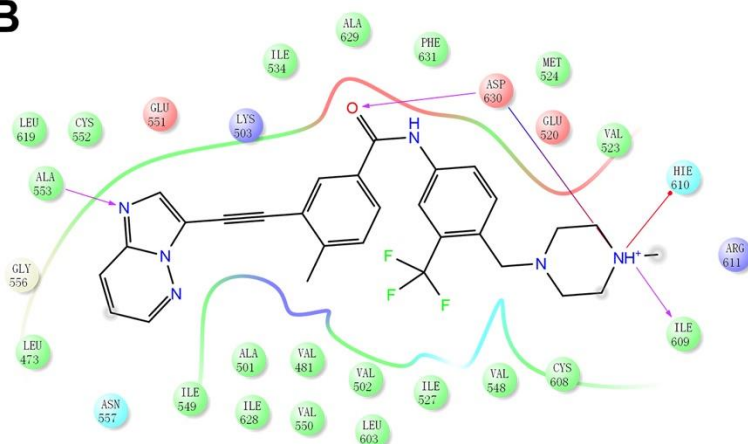

### C

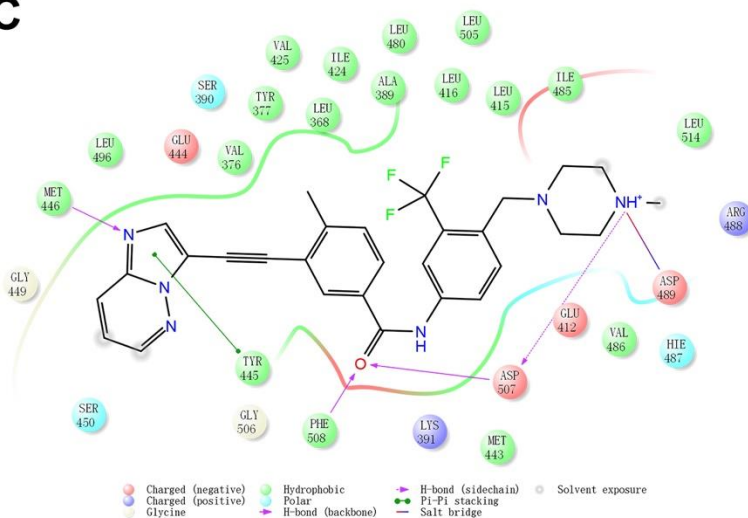

**Fig. S2. Two-dimensional mapping of ponatinib interaction with Abl, FGFR4, and MEKK3. (A) Abl, (B) FGFR4, and (C) MEKK3.**

### Supplementary Figure S3

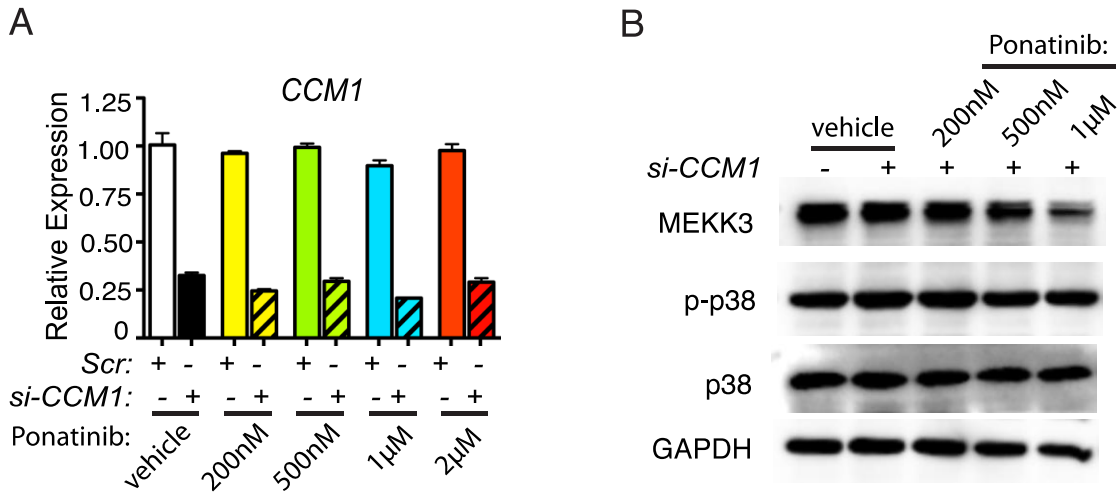

**Fig. S3. CCM1, p38, and MEKK3 expression in cultured HUVECs.** (A) qPCR analysis demonstrating efficient knockdown of *CCM1* with siRNA compared to Scr controls. Ponatinib did not alter *CCM1* expression. Error bars shown as SEM ( $n=4$ ). (B) Western blots show the expression level of MEKK3, p38 and p-p38 in si-*CCM1* HUVECs treated with vehicle or varying doses of Ponatinib. Blots are representatives of three repeats.

## Supplementary Figure S4

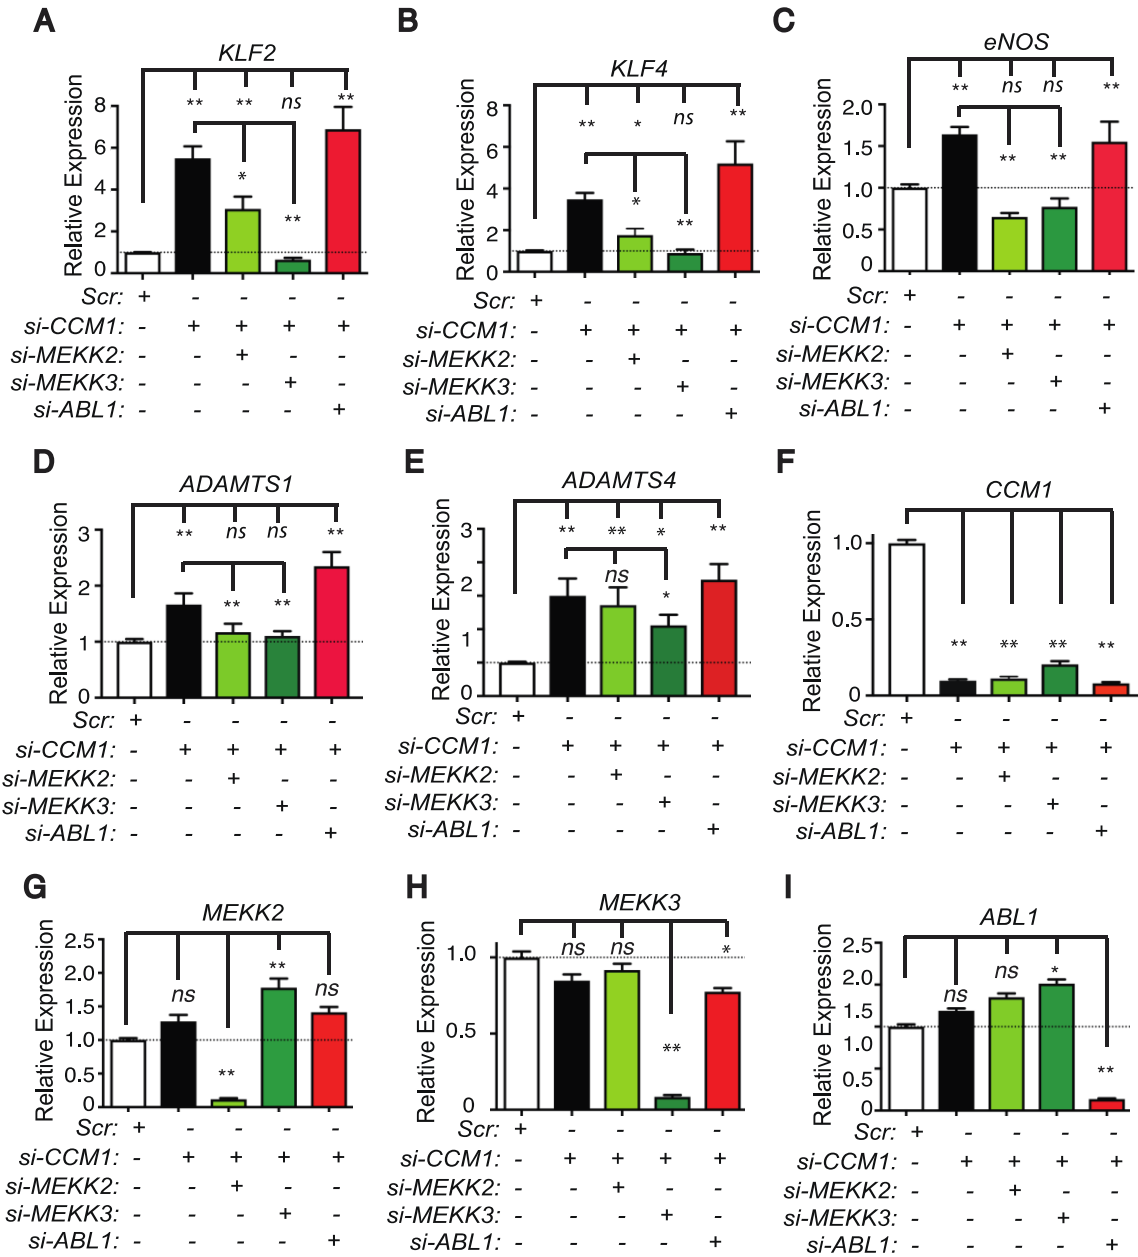

**Fig. S4. MEKK3 is the dominant regulator of KLF signaling.** (A-I) Gene expression analyses show *MEKK3* knockdown completely normalized *KLF* and its target gene expressions. *MEKK2* knockdown can also partially normalize gene expression changes. In contrast, *ABL* knockdown rather increases these gene expressions. Error bars shown as SEM and significance determined

by one-way ANOVA for multiple comparisons ( $n=4$ ). \*  $p<0.05$ ; \*\*  $p<0.001$ ; NS indicates  $p>0.05$ .

Supplementary Figure S5

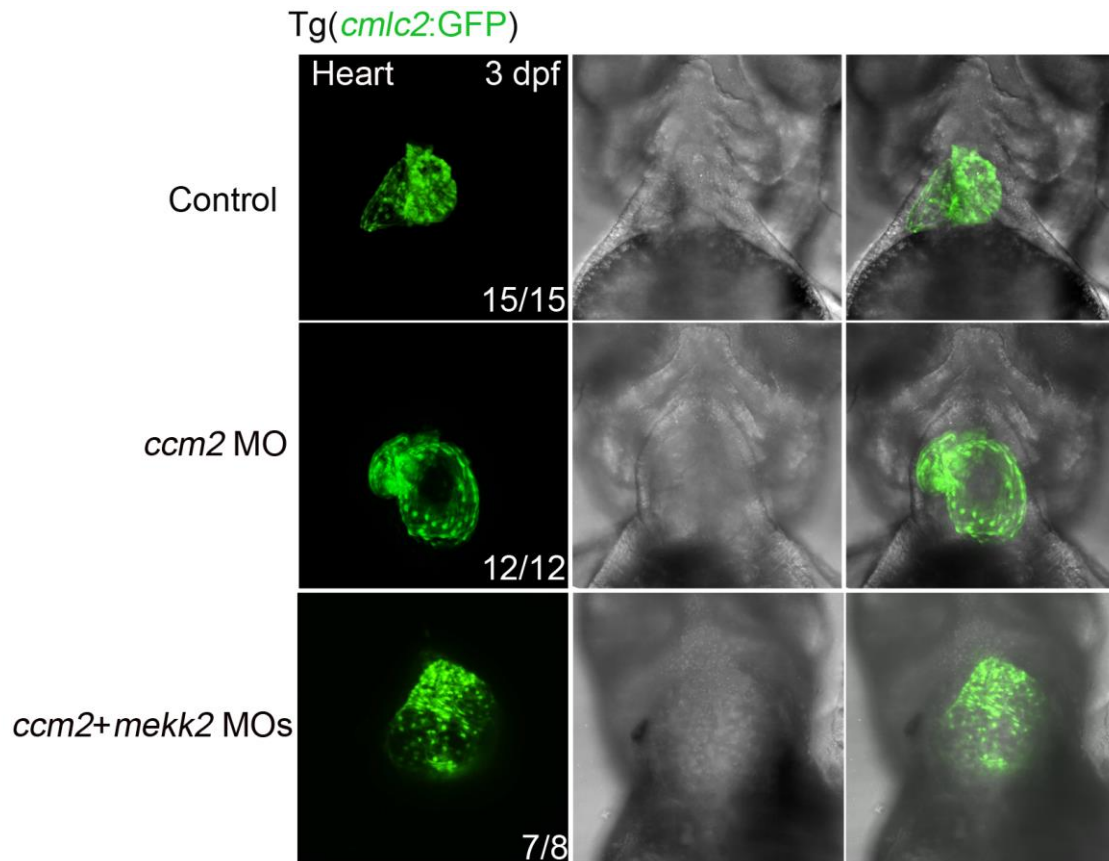

**Fig. S5.** Confocal images of Tg(*cm1c2*:EGFP) embryos injected with control, *ccm2*, or *ccm2* + *mekk2* morpholinos. *ccm2* morphants exhibited dilated heart phenotype that was not rescued with *mekk2* morpholino injection.

Supplementary Figure S6

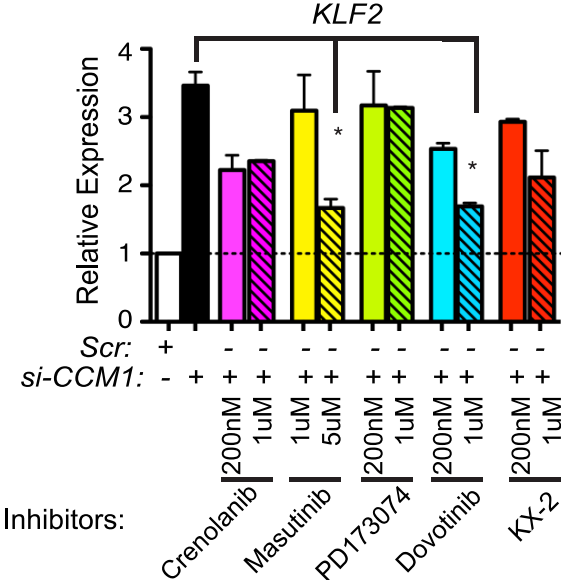

**Fig. S6. Effects of ponatinib and other kinase inhibitors on KLF2 expression.** *si-CCM1* knockdown increases KLF2 expression in HUVECs, Masutinib and Dovotinib, but not PD173074, can partially reverse the increased KLF2 expression in a dosage dependent manner. Results are representative of three independent experiments.



## Supplementary Figure S7

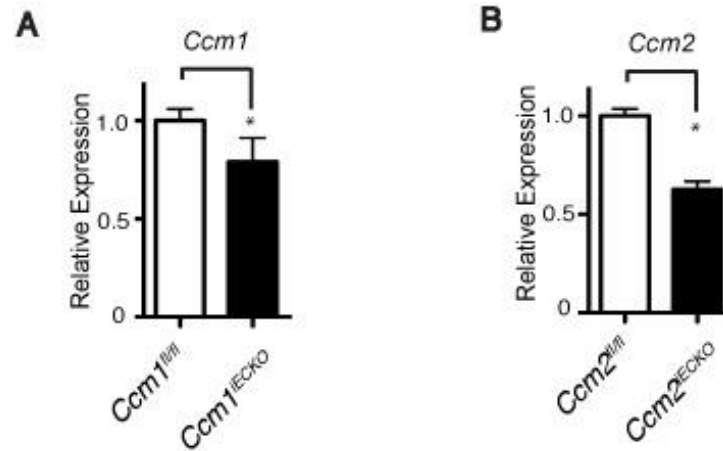

**Fig. S7. qPCR quantification of CCM gene expression in brain endothelial cells isolated from 4-HT-induced p6 pups. (A) CCM1 (n =5) and (B) CCM2 (n= 3 gene expression analysed by qPCR. Error bars shown as SEM and significance determined by t-test. \*p<0.05.**

## Supplementary Figure 8

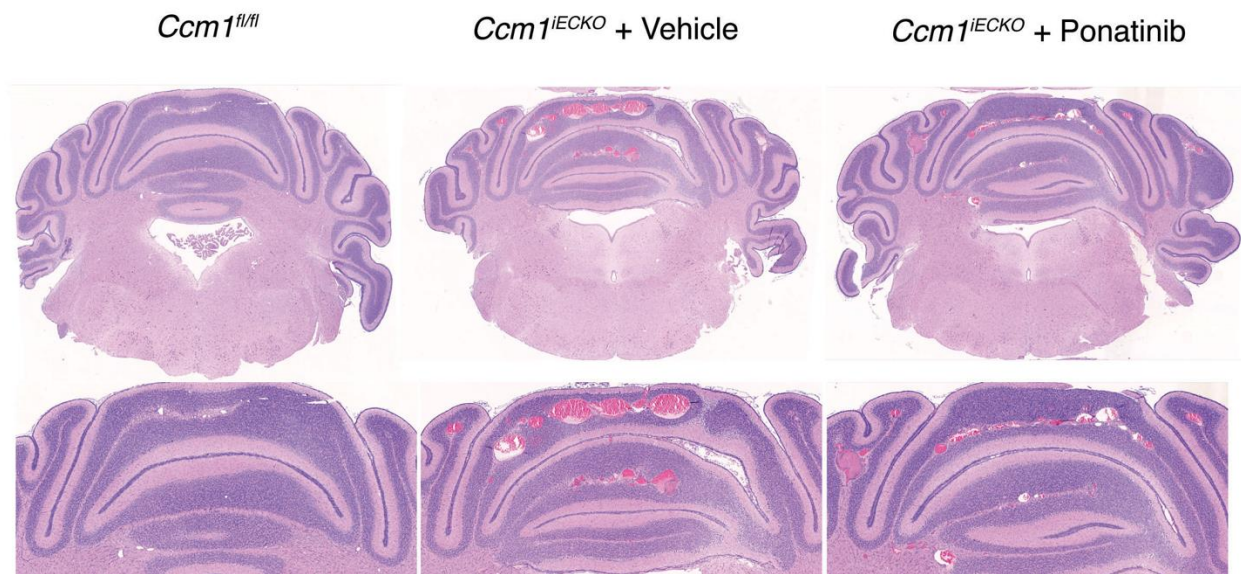

**Fig. S8. Hematoxylin and eosin staining of CCM lesions at P13.** Lesion formation in the *Ccm1<sup>iECKO</sup>* littermates given vehicle or Ponatinib treatment. *Ccm1<sup>fl/fl</sup>* mice were also littermates injected with 4-HT.

## Supplementary Figure 9

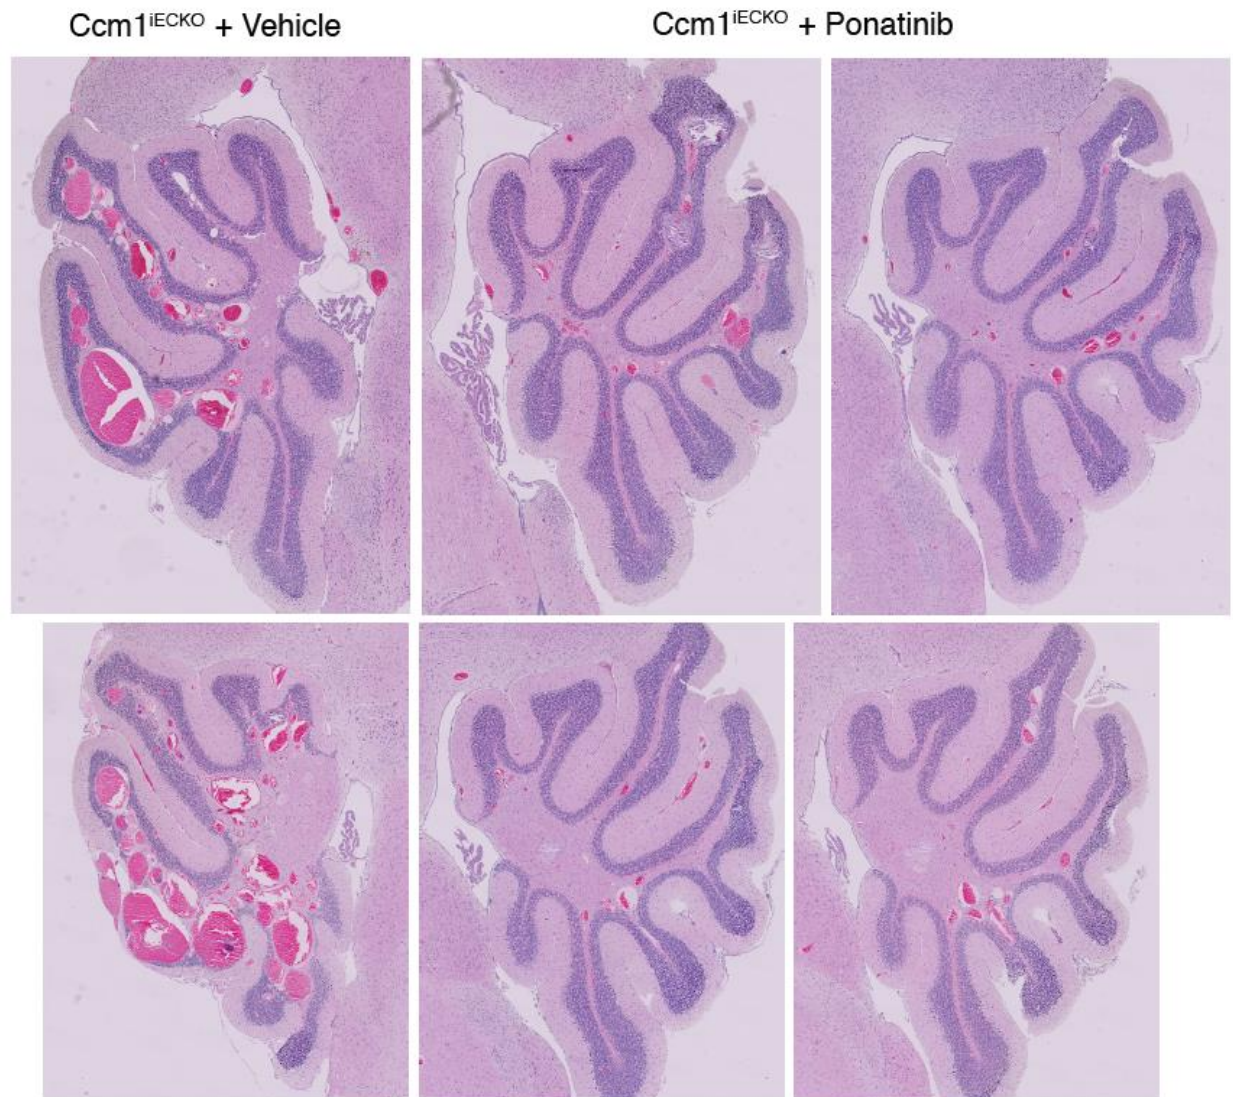

**Fig. S9. Hematoxylin and eosin staining of CCM lesions at P30.** Histology of midbrains sections from *Ccm1*<sup>iECKO</sup> littermates given vehicle or Ponatinib treatment.
